# Supplementary material
Source: MDPI journal article supplement (https://www.mdpi.com/2071-1050/15/6/5299)
Supplement: s1 [file s1]

## Supplementary Material

# China's Biogas Industry's Sustainable Transition to a Low-Carbon Plan—A Socio-Technical Perspective

**Table S1.** Emission Reduction and Economy under Different Strategies.

|         | Total Amount of<br>Manure (Bt) | Livestock<br>Breeding Scale<br>Rate (%) | Comprehensive<br>Utilization<br>Rate (%) | Amount of<br>Manure<br>Available (Bt) | Biogas Utiliza-<br>tion Rate<br>(%) | Biogas Pro-<br>duction Per<br>Unit of Ma-<br>nure | Biogas Pro-<br>duction<br>(Billion m <sup>3</sup> ) | Emission Re-<br>duction<br>(Mt CO <sub>2</sub> e) | Volumetric<br>Gas Produc-<br>tion Rate<br>(m <sup>3</sup> /(m <sup>3</sup> -d)) | Total Volume<br>Capacity<br>(Million m <sup>3</sup> ) | Required Sub-<br>sidies<br>(Billion<br>CNY) |
|---------|--------------------------------|-----------------------------------------|------------------------------------------|---------------------------------------|-------------------------------------|---------------------------------------------------|-----------------------------------------------------|---------------------------------------------------|---------------------------------------------------------------------------------|-------------------------------------------------------|---------------------------------------------|
| Now     | /                              | /                                       | /                                        | /                                     | 10                                  | 16                                                | 2.69                                                | 5                                                 | 0.35                                                                            | 21.98                                                 | 0                                           |
| 2025 RS | 3.65                           | 70                                      | 80                                       | 2.56                                  | 30                                  | 25                                                | 1.92                                                | 34                                                | 0.5                                                                             | 104.99                                                | 124.5                                       |
| 2030 RS | 3.98                           | 75                                      | 85                                       | 2.99                                  | 50                                  | 30                                                | 4.48                                                | 80                                                | 0.6                                                                             | 204.47                                                | 273.7                                       |
| 2060 RS | 3.57                           | 100                                     | 100                                      | 3.57                                  | 80                                  | 50                                                | 14.28                                               | 254                                               | 1                                                                               | 391.23                                                | 553.9                                       |
| 2030 RI | 3.98                           | 75                                      | 85                                       | 2.99                                  | 60                                  | 30                                                | 53.82                                               | 96                                                | 0.6                                                                             | 245.75                                                | 335.66                                      |
| 2030 II | 3.98                           | 75                                      | 85                                       | 2.99                                  | 10                                  | 16                                                | 4.78                                                | 9                                                 | 0.35                                                                            | 37.45                                                 | 23.21                                       |
| 2060 TS | 3.57                           | 100                                     | 100                                      | 3.57                                  | 100                                 | 50                                                | 17.85                                               | 319                                               | 1                                                                               | 467.06                                                | 700.59                                      |

Abbreviations: Bt, billion tons; Mt, million tons; CO<sub>2</sub>e, carbon dioxide equivalent; CNY, Chinese yuan renminbi; RS, report scenario; RI, radical innovation; II, incremental innovation; TS, technological substitution. Methodology from "China Biogas Industry Double Carbon Development Report" (<https://book.yunzhan365.com/zjsx/mtdn/mobile/index.html>, accessed on 14 February 2023) published by the China Biogas Society. Refer to China Rural Energy Yearbook (2014-2022) for the volumetric gas production rate. Biogas subsidies are calculated with reference to the Agricultural Sustainable Development of The Central Budget Investment In The Special Management of Temporary Measures (<http://www.gov.cn/zhengce/zhengceku/2020-01/15/5469487/files/e64a4894d15c45d1b44ed273dea26412.pdf>, accessed on 14 February 2023).
